# Supplementary material for: Hepatic Steatosis Index in the Detection of Fatty Liver in Patients with Chronic Hepatitis B Receiving Antiviral Therapy
Source: PubMed Central journal article supplement — Gut Liver. 2020 Feb 20;15(1):117–27. doi: 10.5009/gnl19301 (PMC7817922; doi:10.5009/gnl19301), 2020-02-20
Supplement: gnl-15-1-117-supple.pdf [file gnl-15-1-117-supple.pdf]

**Supplementary Table 1.** Correlation between the Fat Fraction and Other Variables in the Entire Study Population (Pearson's Correlation Analysis)

| Variable                           | Correlation coefficient | p-value |
|------------------------------------|-------------------------|---------|
| Platelet count, 10 <sup>9</sup> /L | 0.486                   | <0.001  |
| Liver cirrhosis                    | -0.441                  | <0.001  |
| Age, yr                            | -0.418                  | <0.001  |
| Hepatic steatosis index            | 0.400                   | <0.001  |
| Alanine aminotransferase, U/L      | 0.265                   | <0.001  |
| BMI, kg/m <sup>2</sup>             | 0.255                   | <0.001  |
| Serum albumin, g/dL                | 0.192                   | 0.001   |
| Total cholesterol, mg/dL           | 0.188                   | 0.001   |
| Total bilirubin, mg/dL             | -0.164                  | 0.004   |
| Diabetes                           | 0.143                   | 0.012   |
| Aspartate aminotransferase, U/L    | 0.139                   | 0.015   |
| Total protein                      | 0.132                   | 0.001   |
| Dyslipidemia                       | 0.056                   | 0.332   |
| Male sex                           | -0.018                  | 0.760   |
| Prothrombin time, INR              | -0.091                  | 0.229   |
| Hypertension                       | -0.098                  | 0.086   |

BMI, body mass index; INR, international normalized ratio.

**Supplementary Table 2.** Predictors of the Presence of Fatty Liver in the Entire Study Population

| Variable                           | Univariate<br>p-value | Multivariate        |         |
|------------------------------------|-----------------------|---------------------|---------|
|                                    |                       | OR (95% CI)         | p-value |
| Age, yr                            | <0.001                | 0.988 (0.962–1.015) | 0.382   |
| Hypertension                       | 0.740                 | -                   | -       |
| Liver cirrhosis                    | <0.001                | 0.496 (0.226–1.089) | 0.081   |
| Dyslipidemia                       | 0.751                 | -                   | -       |
| Total bilirubin, mg/dL             | 0.001                 | 0.733 (0.304–1.769) | 0.490   |
| Serum albumin, g/dL                | <0.001                | 1.904 (0.604–6.002) | 0.272   |
| Platelet count, 10 <sup>9</sup> /L | <0.001                | 1.012 (1.006–1.019) | <0.001  |
| Hepatic steatosis index            | <0.001                | 1.155 (1.076–1.240) | <0.001  |

OR, odds ratio; CI, confidence interval.
